# Supplementary material for: Energy-efficient electrochemical ammonia production from dilute nitrate solution
Source: Royal Society of Chemistry journal article supplement (doi:10.1039/d2ee03461a), 2023-01-01
Supplement: d2ee03461a1.pdf [file d2ee03461a1.pdf]

## Supplementary Material

### Energy-efficient electrochemical ammonia production from dilute nitrate solution

*Keon-Han Kim<sup>a</sup> Heebin Lee,<sup>b</sup> Xiaopeng Huang,<sup>a,c</sup> Jong Hui Choi,<sup>b</sup> Chunping Chen,<sup>a</sup> Jeung Ku Kang<sup>b\*</sup> and  
Dermot O'Hare<sup>a\*</sup>*

<sup>a</sup>Department of Chemistry  
Chemical Research Laboratory, University of Oxford  
OX1 3TA, United Kingdom

<sup>b</sup>Department of Materials Science and Engineering  
Korea Advanced Institute of Science and Technology (KAIST)  
34141, Republic of Korea

<sup>c</sup>Department of Chemistry  
Faculty of Arts and Sciences, Beijing Normal University, Zhuhai  
519087, China

\*Corresponding authors : jeung@kaist.ac.kr, dermat.ohare@chem.ox.ac.uk

#### Table of Contents

- I. Methods**
- II. Supplementary structural characterisation**
- III. Supplementary electrochemical analysis**
- IV. Supplementary X-ray techniques**
- V. Supplementary table**

## I. Methods detail

### I-1. Preparation

**Chemicals** Nickel chloride (Sigma-Aldrich, >98 %), cobalt chloride (Sigma-Aldrich, >97 %), zinc chloride (Sigma-Aldrich, >98 %), magnesium chloride (Sigma-Aldrich, >98 %), vanadium chloride (Sigma-Aldrich, >97 %), iron chloride (Sigma-Aldrich, >97 %), aluminium chloride (Sigma-Aldrich, >98 %), urea (Sigma-Aldrich, >99.5 %), sodium carbonate (Sigma-Aldrich, >99.5 %), sodium hydroxide (Sigma-Aldrich, >98 %), potassium hydroxide (Sigma-Aldrich, >85%), perfluorinated resin solution containing Nafion™ 1100W (Sigma-Aldrich), hydrochloric acid (Sigma-Aldrich, >37 %), potassium nitrate (Sigma-Aldrich, >99 %), potassium nitrite (Sigma-Aldrich, >96 %), dimethyl sulfoxide (DMSO, Sigma-Aldrich, anhydrous, >99.9%), deuterium oxide (Sigma-Aldrich, >99.9 atom % D), salicylic acid (Sigma-Aldrich, >99 %), sodium citrate monobasic (Sigma-Aldrich, >99 %), sodium hypochlorite (Sigma-Aldrich, 6-14 % active chlorine), sodium nitroferricyanide (Sigma-Aldrich, >99 %), sulfanilamide (Sigma-Aldrich, >99 %), N-(1-Naphthyl) ethylenediamine dihydrochloride (Sigma-Aldrich, >99 %), sulfamic acid (Sigma-Aldrich, >99.3 %). All reagents were used as received in air without further purification.

### I-2. Structural characterizations

The powder X-ray diffraction (PXRD) spectra were gained using a Bruker D8 Discovery instrument using Cu K $\alpha$  radiation ( $\lambda = 1.5406 \text{ \AA}$ ) from  $2\theta = 3^\circ$  to  $70^\circ$  with a  $0.02^\circ$  step size. Infrared spectra were collected on a Vertex 80 Spectrometer, equipped with a high performance DuraSamp1IR II diamond accessory of attenuated total reflection (ATR) mode with a range of  $600 \text{ cm}^{-1} \sim 4000 \text{ cm}^{-1}$ . The *ex situ* synchrotron X-ray absorption measurements were performed at 10 C beamline of Pohang Accelerator Laboratory (PAL, Republic of Korea), and a calibration of each metal K-edge spectrum was accomplished by employing the reference spectrum from the corresponding each metal foil. The X-ray Photon Spectroscopy (XPS) results were obtained by using the K-alpha instrument (Thermo Scientific) equipped with the Al K $\alpha$  micro-focused X-ray monochromator (1487 eV). Nitrogen adsorption–desorption isotherms and pore-size distribution were recorded at 77.4 K in a Micrometric Tristar surface characterization analyzer. Samples were degassed at 80 °C for 12 hours under vacuum prior to analysis. The UV-Vis spectrum was obtained using a V-570 UV-vis spectrometer (Jasco, Japan). The transmission electron microscopy (TEM) images were gained by a JEM-ARM200F model (JEOL LTD., Japan) and the Cs-

corrected scanning TEM (STEM) measurements were performed for the energy dispersive X-ray spectrometer (EDS) mapping images using a BRUKER QUANTAX EDS. The ESR data were taken by X-band (9.48 GHz) ESR spectrometer (JEOL, JES-FA200) operating at room temperature.

## II. Supplementary structural characterisations

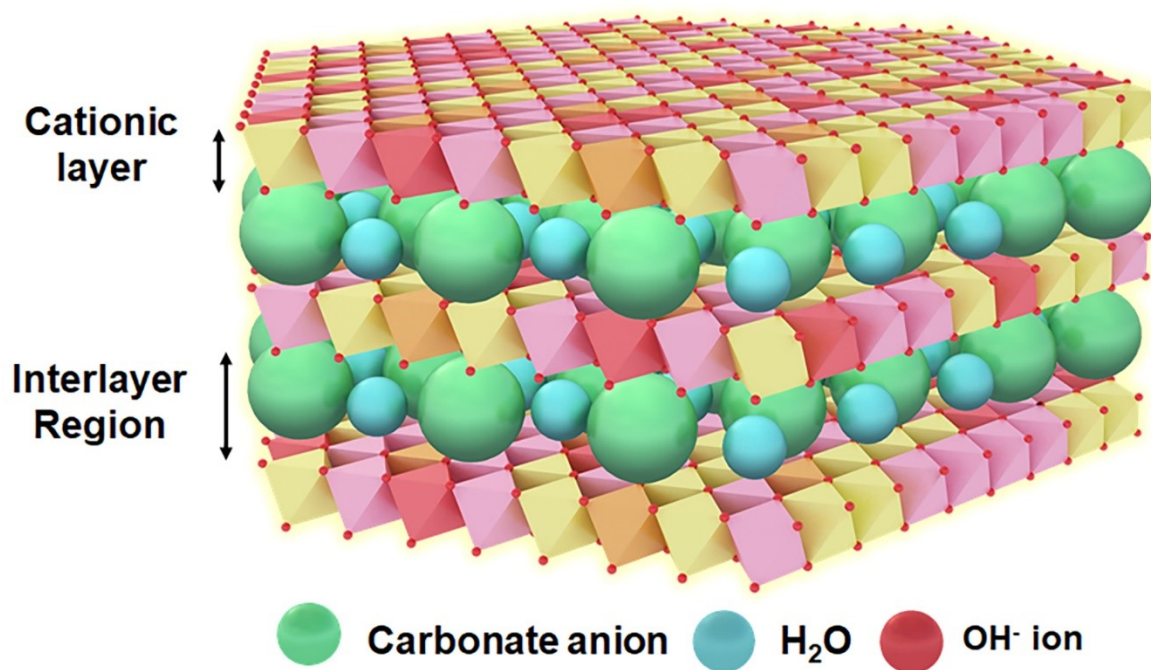

**Fig. S1** | A schematic image of layered double hydroxide structure. In the cationic layers, different types of metal cations can be included in LDH structure.

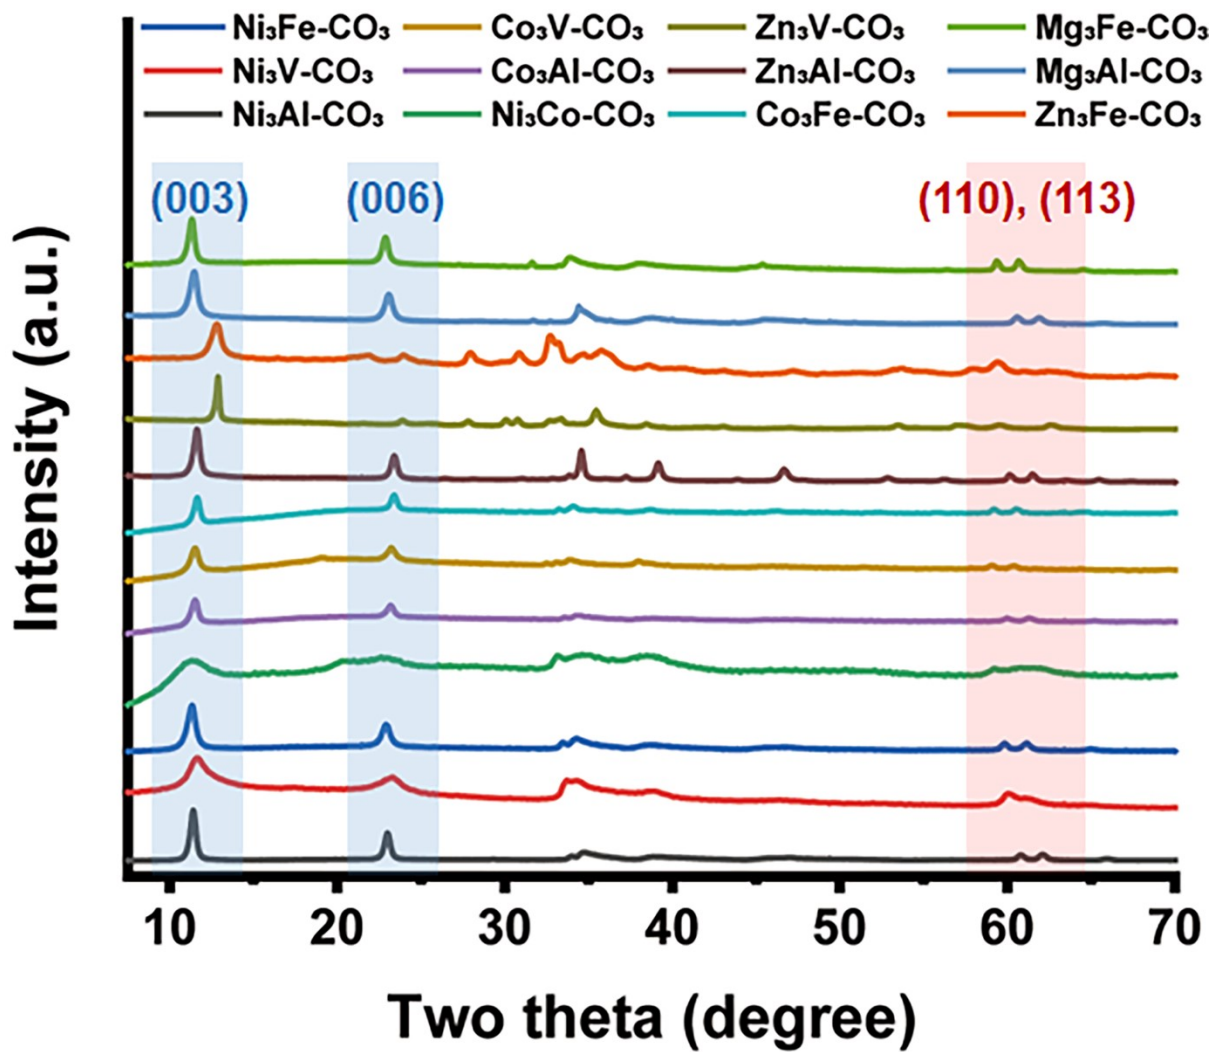

Fig. S2 | PXRD patterns for different LDHs.

A

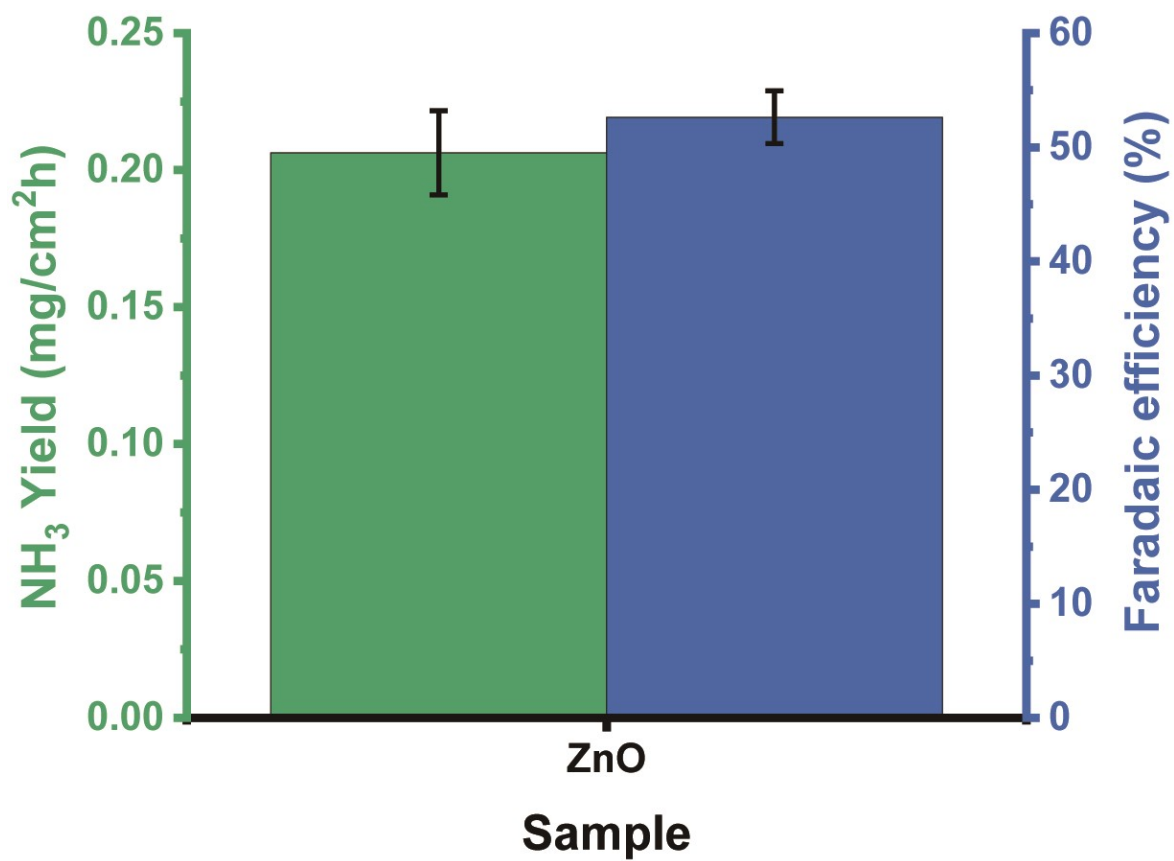

Fig. S3 | NH<sub>3</sub> productivity and faradaic efficiency (%) using pure ZnO/Cu foam electrode. Electrocatalysis reactions was operated at 1 M KOH electrolyte with 5 mM of KNO<sub>3</sub> at -0.2 V (vs RHE).

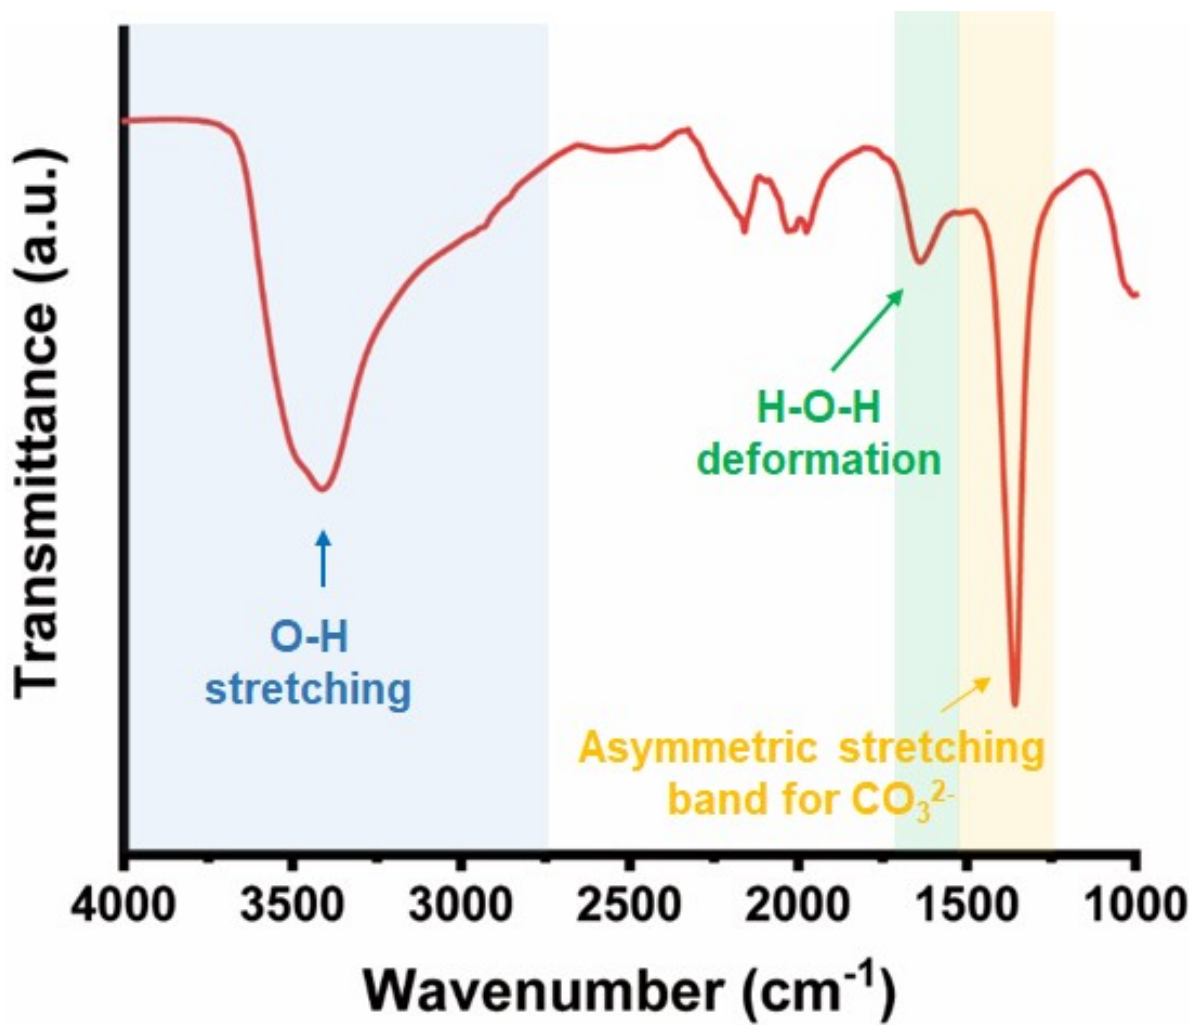

Fig. S4 | FT-IR spectrum of the Ni<sub>3</sub>Fe-CO<sub>3</sub> LDH.

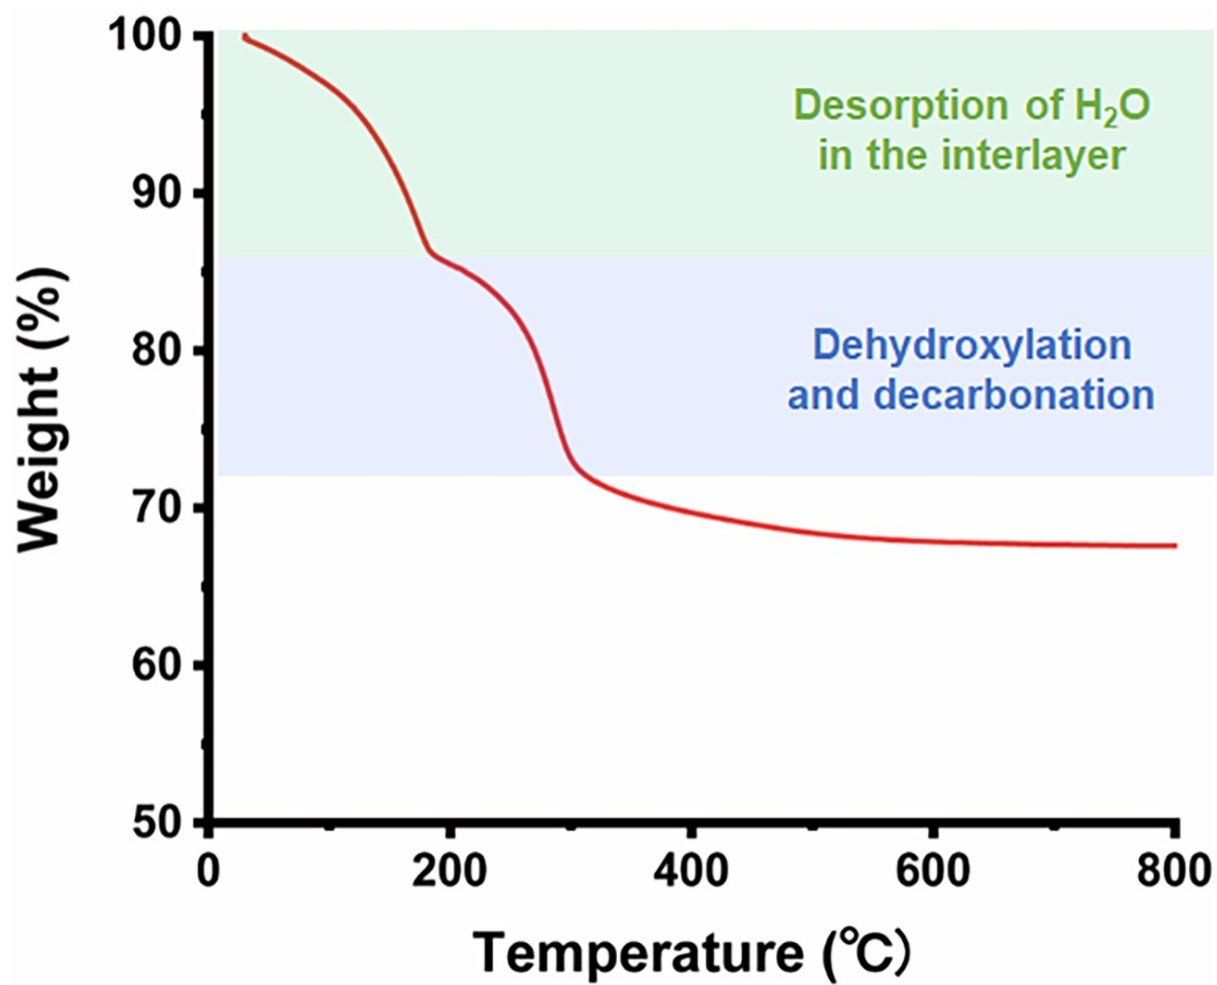

Fig. S5 | TGA curve of the Ni<sub>3</sub>Fe-CO<sub>3</sub> LDH.



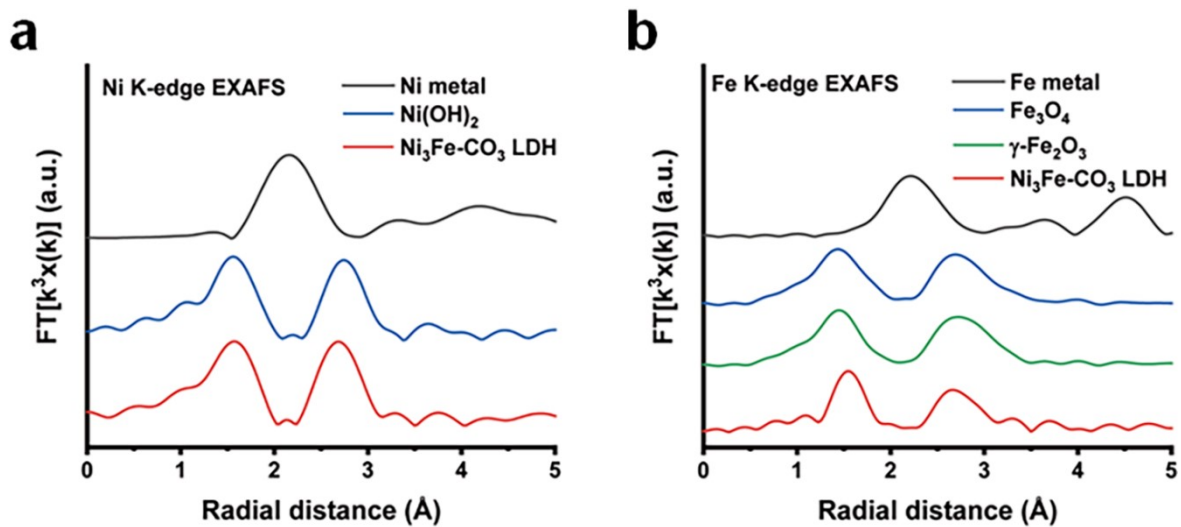

Fig. S6 | (a) Ni K-edge and (b) Fe K-edge FT-EXAFS of the Ni<sub>3</sub>Fe-CO<sub>3</sub> LDH with selected reference materials.

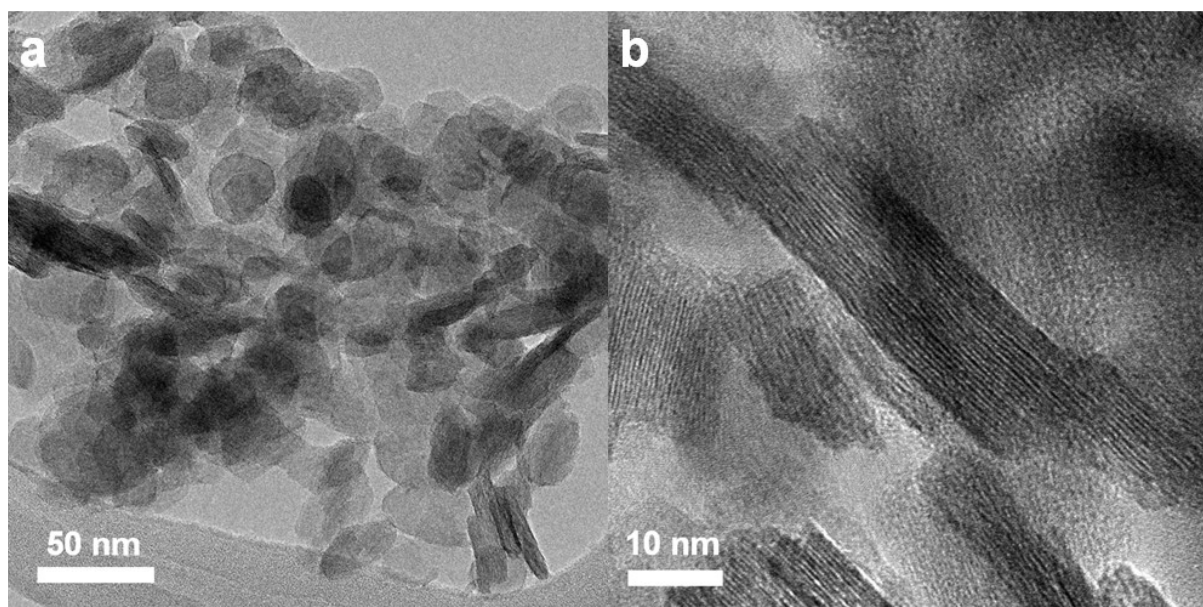

**Fig. S7 | TEM and HR-TEM images of the  $\text{Ni}_3\text{Fe-CO}_3$  LDH.**

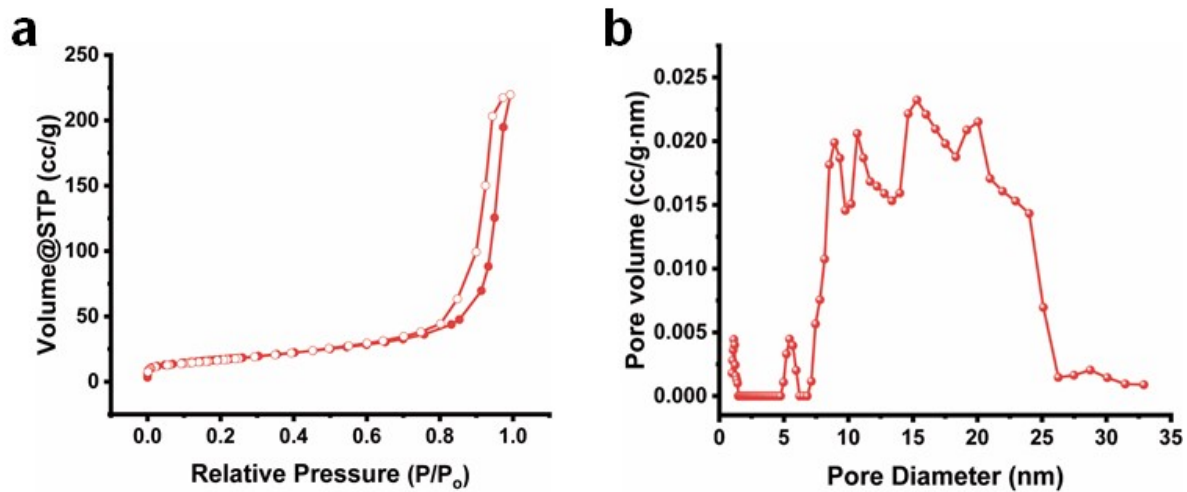

Fig. S8 | (a) N<sub>2</sub> adsorption-desorption isotherm and (b) pore size distribution of the Ni<sub>3</sub>Fe-CO<sub>3</sub> LDH.

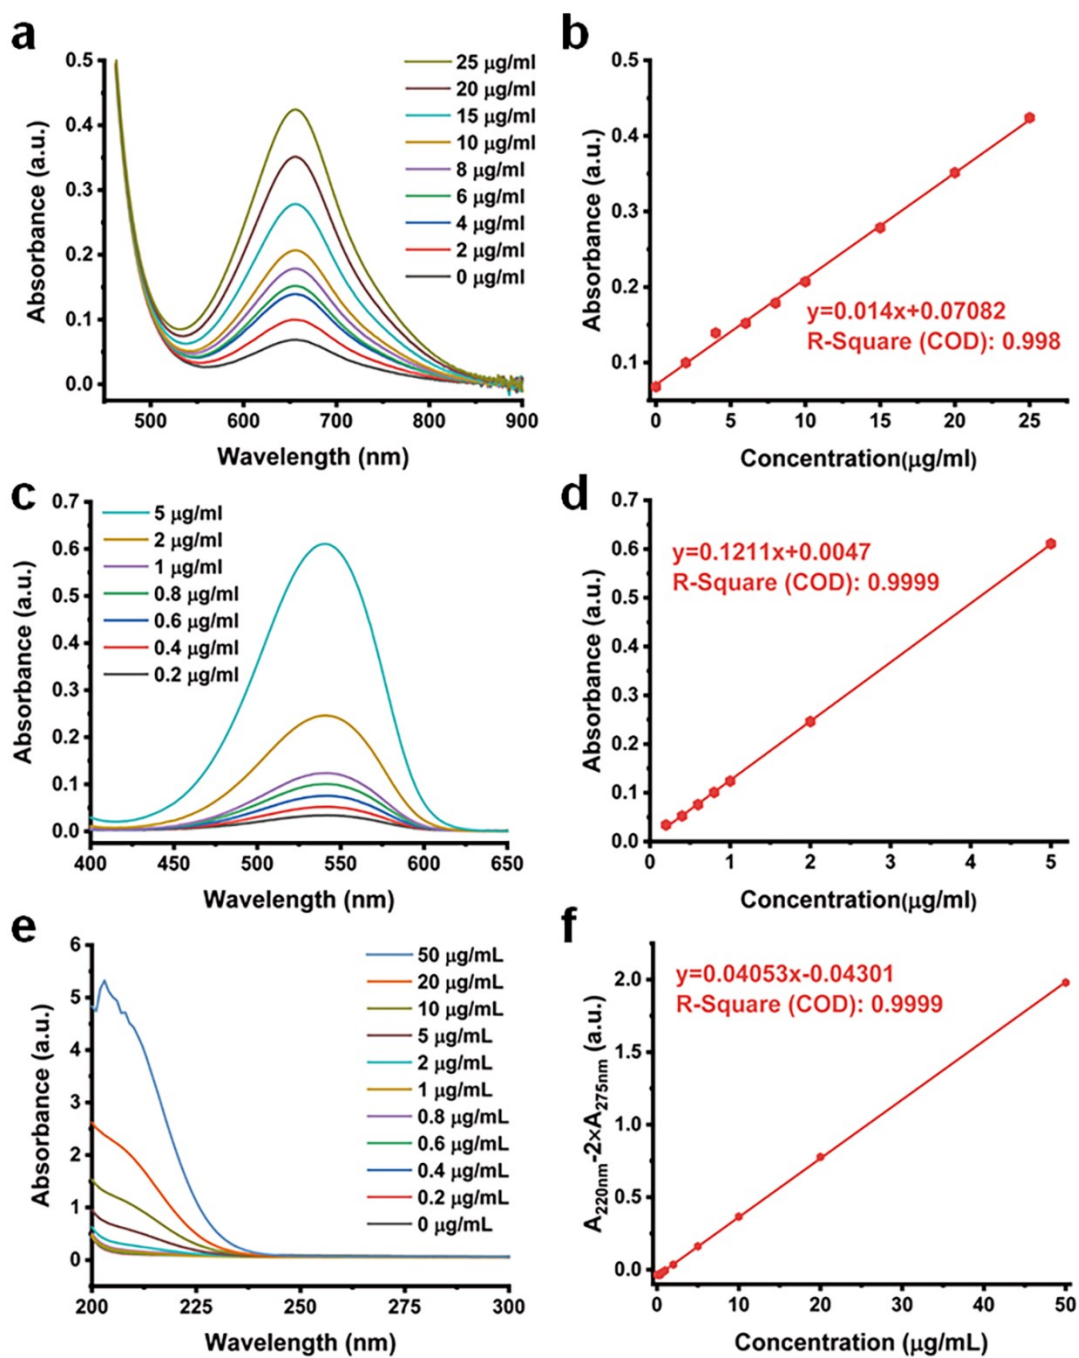

**Fig. S9 | Determining the amount of  $\text{NH}_3$  and  $\text{NO}_2^-$ .** (a) UV-vis absorption spectrum changes of  $\text{NH}_3$  amount. (b) Calibration curve. ( $y = a \cdot x + b$ ,  $a = 0.014$ ,  $b = 0.07082$ ,  $\text{COD} = 0.998$ ) (c) UV-vis absorption spectrum changes of  $[\text{NO}_2^-]$ . (d) Calibration curve. ( $y = a \cdot x + b$ ,  $a = 0.1211$ ,  $b = 0.0047$ ,  $\text{COD} = 0.9999$ ) (e) UV-vis absorption spectrum as function of  $[\text{NO}_3^-]$ . (f) Calibration curve. ( $y = a \cdot x + b$ ,  $a = 0.04053$ ,  $b = -0.04301$ ,  $\text{COD} = 0.9999$ )

### III. Supplementary electrochemical analysis

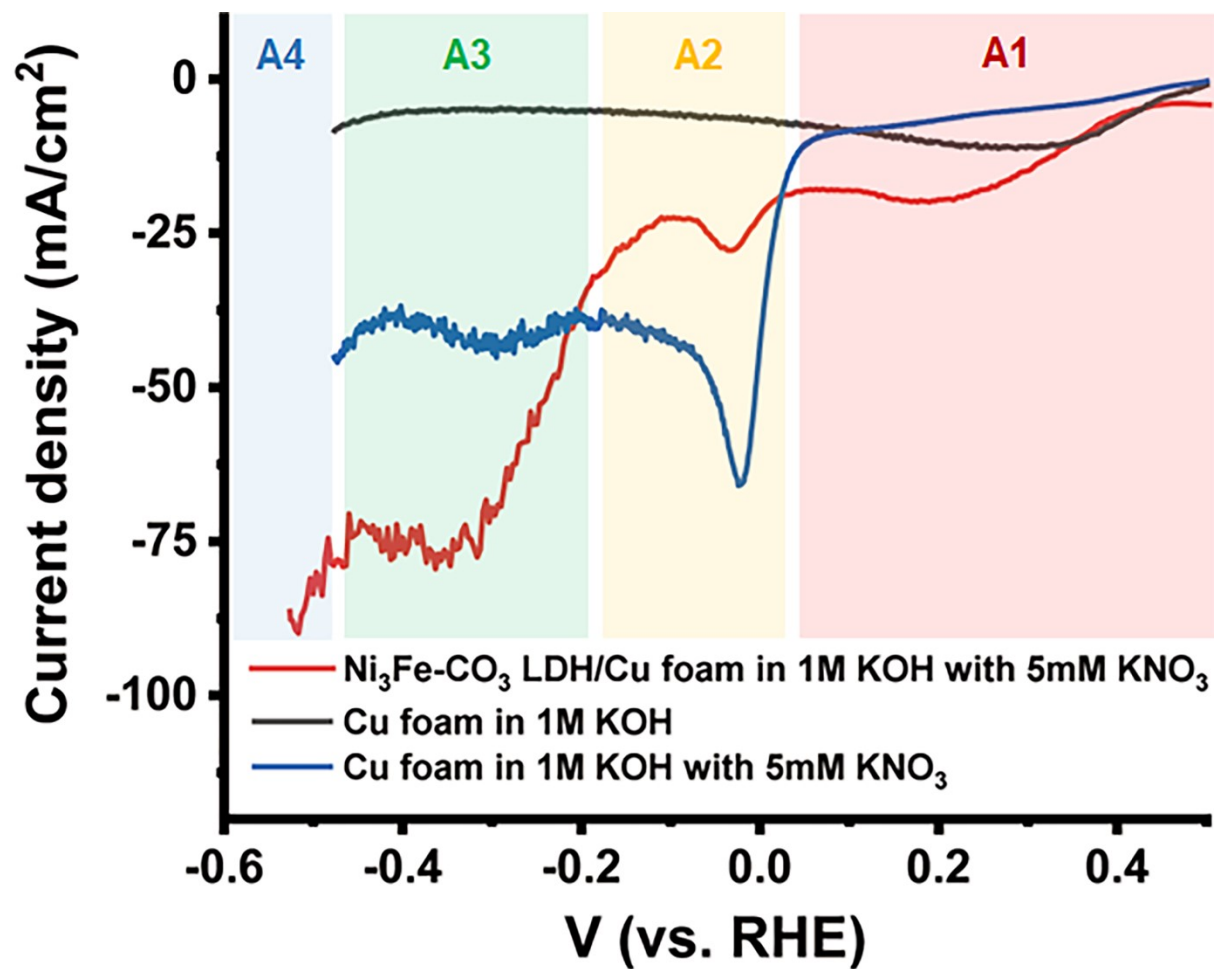

Fig. S10 | LSV curves for Ni<sub>3</sub>Fe-CO<sub>3</sub> LDH/Cu foam and Cu foam with/without KNO<sub>3</sub>

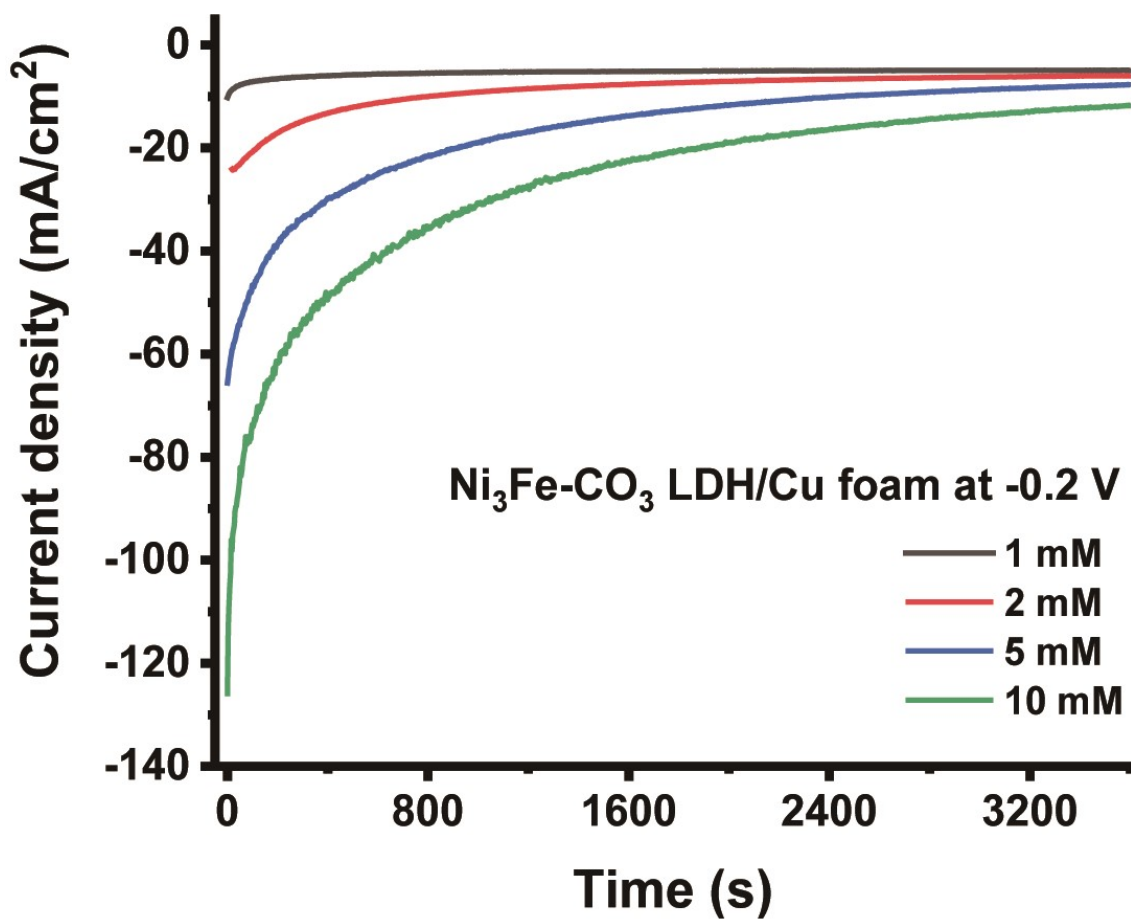

Fig. S11 | i-t curve depending on the different concentration of KNO<sub>3</sub>.

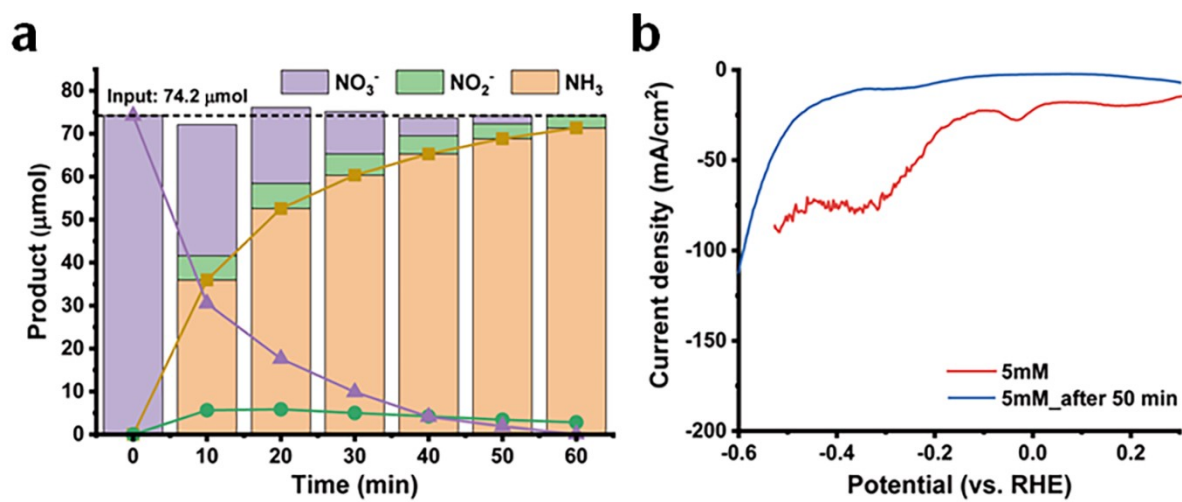

Fig. S12 | (a) Time-dependent product variation analysis and (b) LSV curves of the Ni<sub>3</sub>Fe-CO<sub>3</sub> LDH/Cu foam before electrochemical NitRR and after 50 min of reaction under 1 M KOH with 5 mM KNO<sub>3</sub>.

#### IV. Supplementary X-ray techniques

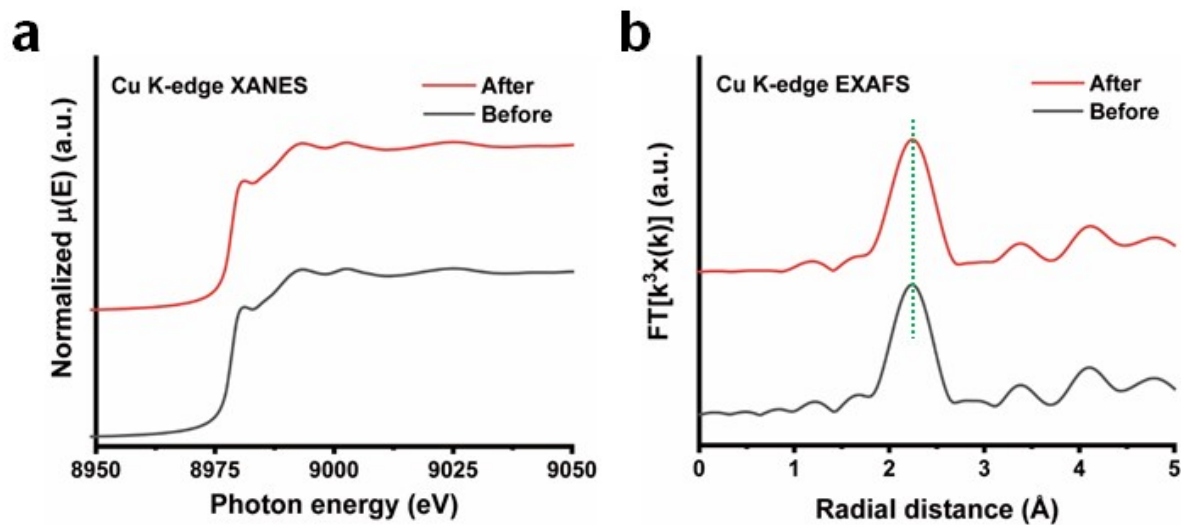

**Fig. S13 | Ex-situ Cu K-edge XAS analysis.** (a) Cu K-edge XANES spectra and (b) Cu K-edge EXAFS spectra before/after electrochemical nitrate reduction. The after-RXN sample has analysed after 1 cycle of electrochemical reaction conducted by chronoamperometric technique for an hour at  $-0.2$  V (vs RHE) in 1 M KOH with 5 mM of  $\text{KNO}_3$ .



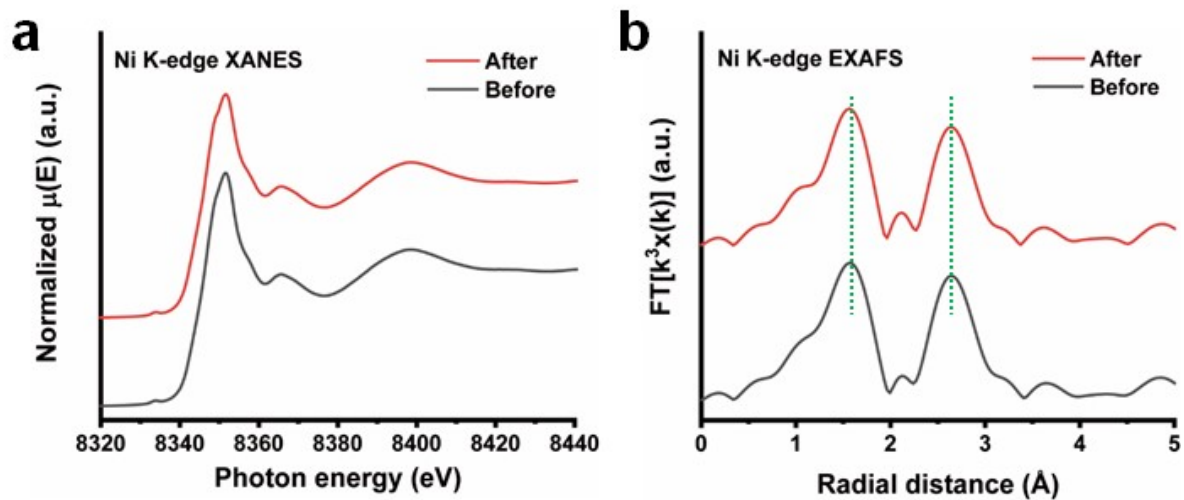

**Fig. S14 | Ex-situ Ni K-edge XAS analysis.** (a) Ni K-edge XANES spectra and (b) Ni K-edge EXAFS spectra before/after electrochemical nitrate reduction. The after-RXN sample has analysed after 1 cycle of the electrochemical reaction conducted by chronoamperometric technique for an hour at  $-0.2$  V (vs RHE) in 1 M KOH with 5 mM of  $KNO_3$ .

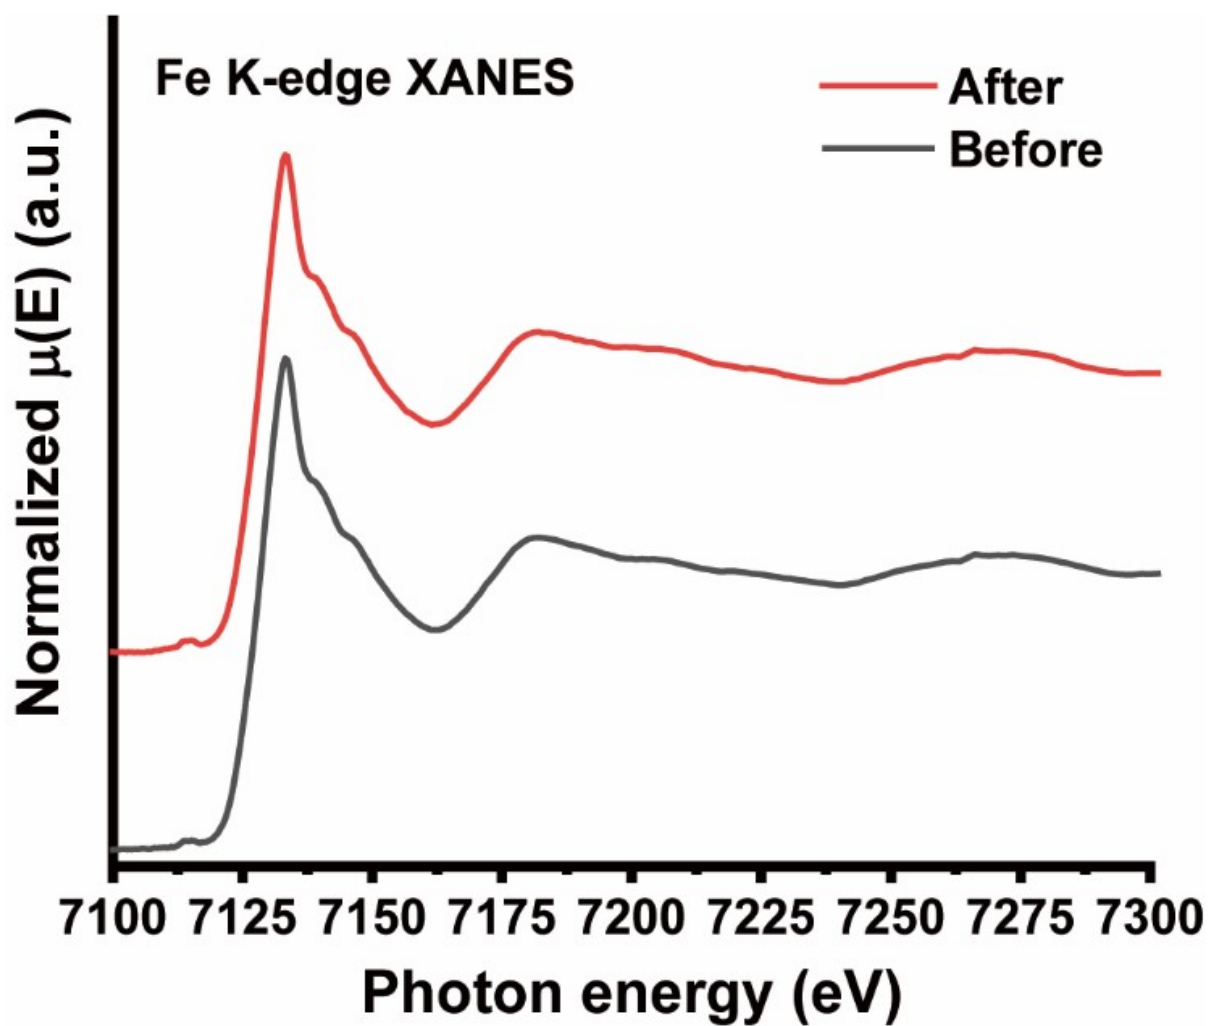

Fig. S15 | Ex-situ Fe K-edge XANES spectrum before/after electrochemical nitrate reduction. The after-RXN sample has analysed after 1 cycle of the electrochemical reaction conducted by chronoamperometric technique for an hour at  $-0.2$  V (vs RHE) in 1 M KOH with 5 mM of  $\text{KNO}_3$ .

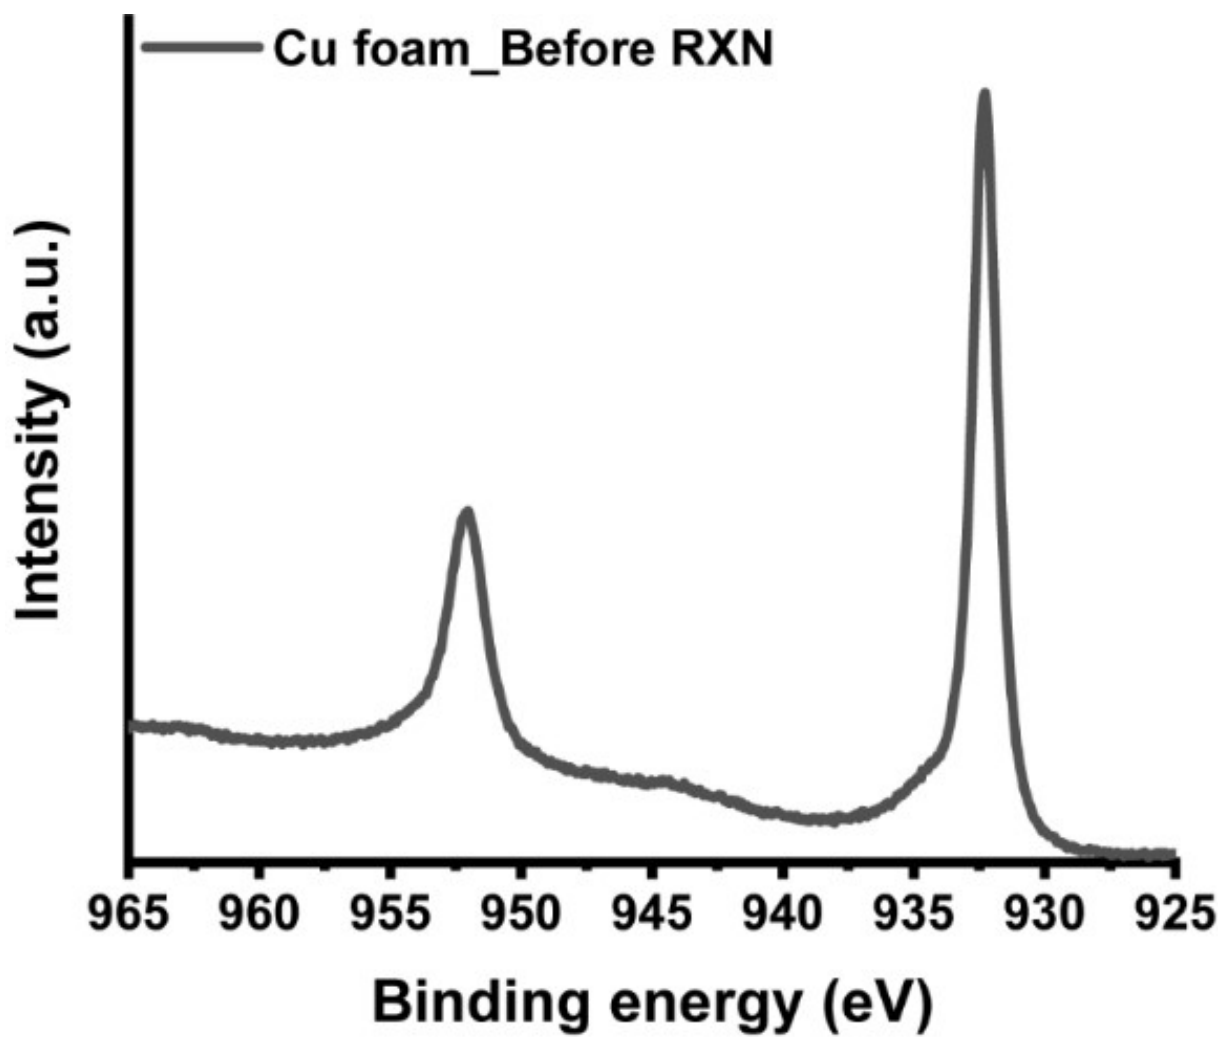

Fig. S16 | Cu 2p XPS for Cu foam electrode.

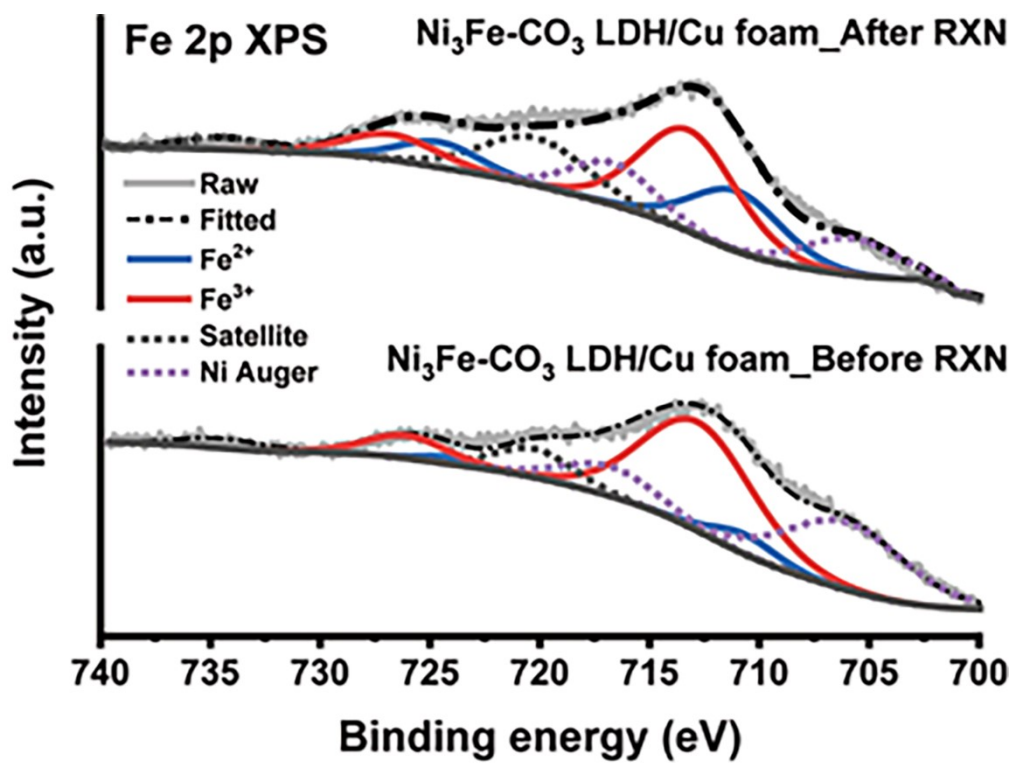

Fig. S17 | Fe 2p XPS for the Ni<sub>3</sub>Fe-CO<sub>3</sub> LDH/Cu foam electrode before/after electrochemical nitrate reduction. The after-RXN sample has analysed after 1 cycle of electrochemical reaction conducted by chronoamperometric technique for an hour at -0.2 V (vs RHE) in 1 M KOH with 5 mM of KNO<sub>3</sub>.

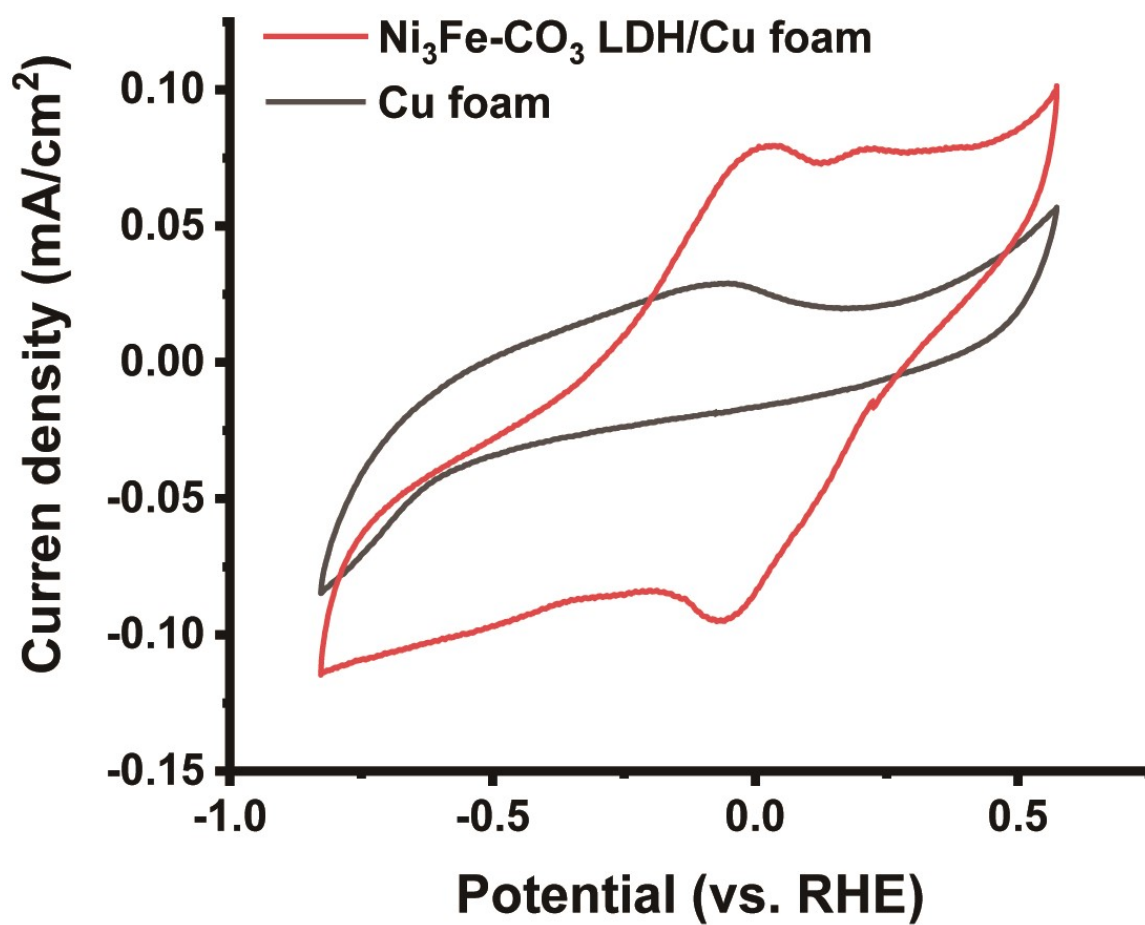

Fig. S18 | CV curves for Ni<sub>3</sub>Fe-CO<sub>3</sub> LDH/Cu foam and Cu foam under 1M KOH.

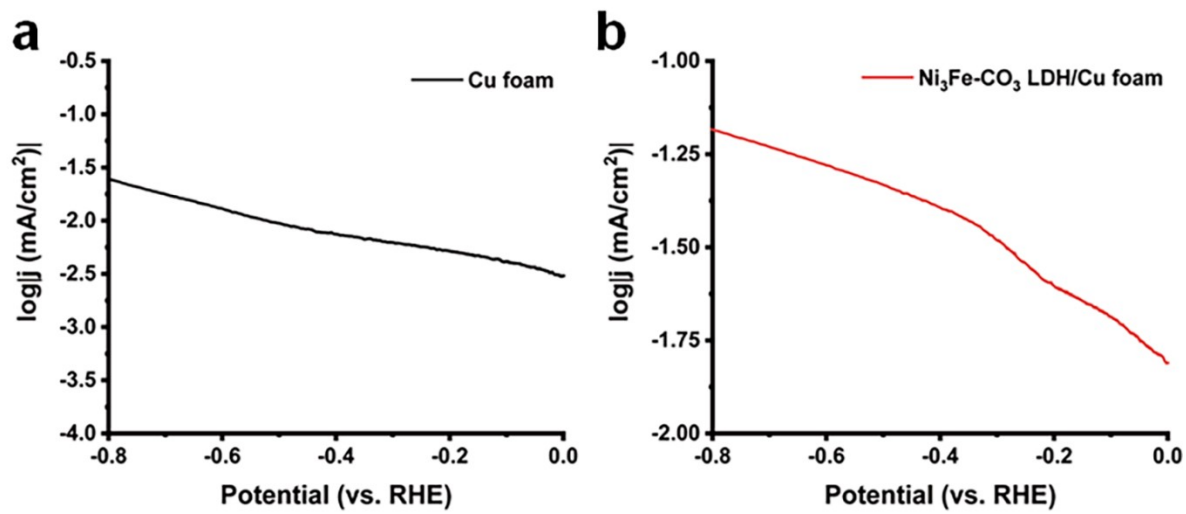

Fig. S19 | Tafel slopes for Ni<sub>3</sub>Fe-CO<sub>3</sub> LDH/Cu foam and Cu foam under 1M KOH.

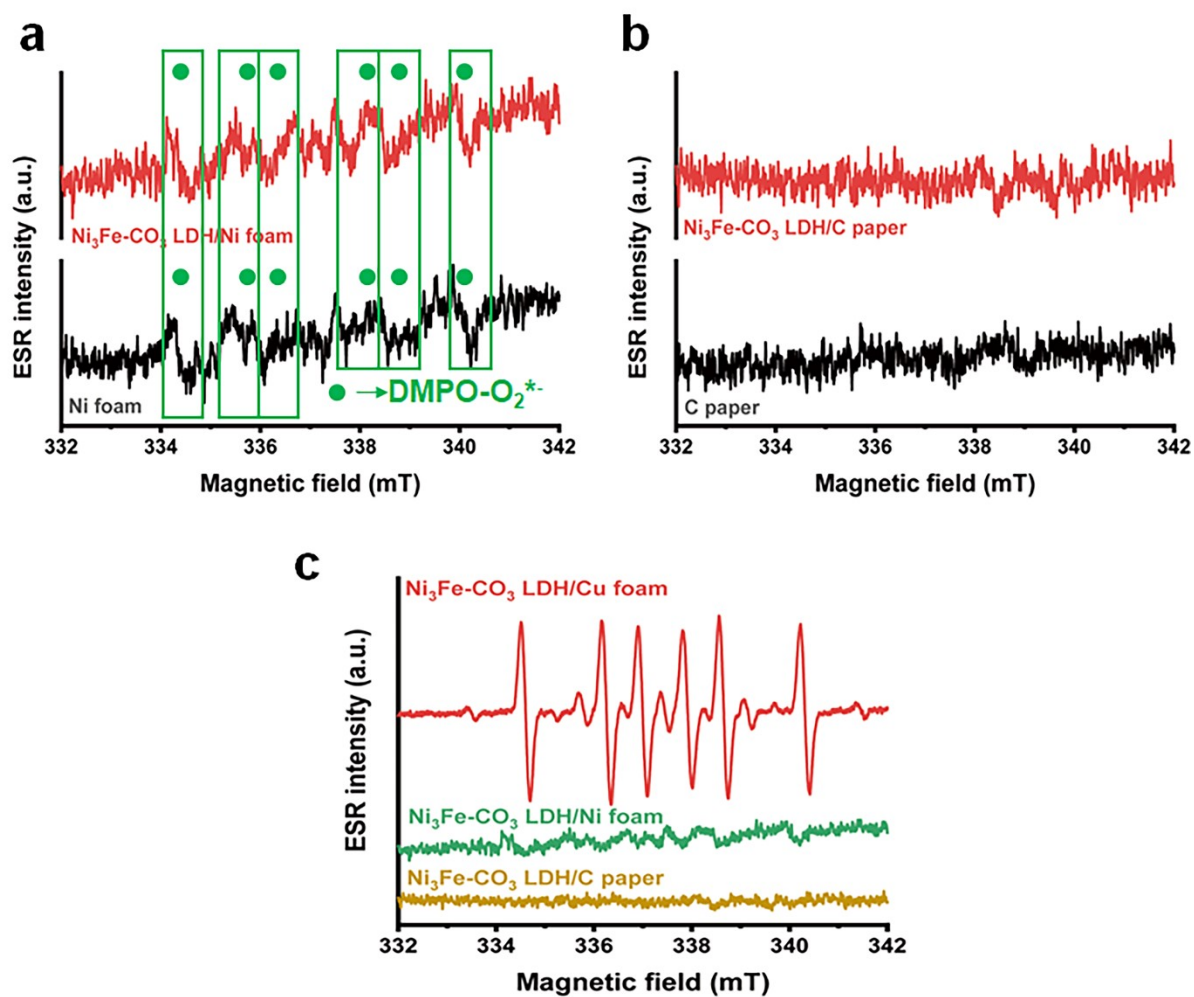

Fig. S20 | ESR spectra of the solutions obtained by (a) the  $\text{Ni}_3\text{Fe-CO}_3$  LDH/Ni foam, Ni foam electrodes, (b) the  $\text{Ni}_3\text{Fe-CO}_3$  LDH/C paper and C paper in presence of 50 mM DMPO in 1 M KOH. (c) ESR spectra comparison depending on the different supporting materials. The electrochemical reaction was conducted by chronoamperometric technique for an hour to trap the radicals.

## VI. Supplementary table

**Table S1 | Lattice parameters and basal spacing for the synthesised LDHs.**

| Sample                             | $d_{003}$ (Å) | Lattice parameters (Å) <sup>a</sup> |       | Crystal domain size (Å) |             |
|------------------------------------|---------------|-------------------------------------|-------|-------------------------|-------------|
|                                    |               | $a$                                 | $c$   | $c$ -axis               | $ab$ -plane |
| Ni <sub>3</sub> Al-CO <sub>3</sub> | 7.76          | 3.04                                | 23.28 | 182.60                  | 223.66      |
| Ni <sub>3</sub> V-CO <sub>3</sub>  | 7.56          | 3.08                                | 22.66 | 68.78                   | 134.36      |
| Ni <sub>3</sub> Fe-CO <sub>3</sub> | 7.83          | 3.09                                | 23.48 | 122.38                  | 184.56      |
| Ni <sub>3</sub> Co-CO <sub>3</sub> | 7.88          | 3.12                                | 23.65 | 44.75                   | 134.36      |
| Co <sub>3</sub> Al-CO <sub>3</sub> | 7.70          | 3.08                                | 23.10 | 131.23                  | 170.86      |
| Co <sub>3</sub> V-CO <sub>3</sub>  | 7.71          | 3.12                                | 23.12 | 119.43                  | 231.87      |
| Co <sub>3</sub> Fe-CO <sub>3</sub> | 7.61          | 3.12                                | 22.82 | 174.75                  | 276.06      |
| Zn <sub>3</sub> Al-CO <sub>3</sub> | 7.62          | 3.07                                | 22.85 | 172.83                  | 275.69      |
| Zn <sub>3</sub> V-CO <sub>3</sub>  | 6.89          | 3.10                                | 20.66 | 194.07                  | 281.32      |
| Zn <sub>3</sub> Fe-CO <sub>3</sub> | 6.92          | 3.19                                | 20.77 | 115.51                  | 288.68      |
| Mg <sub>3</sub> Al-CO <sub>3</sub> | 7.74          | 3.05                                | 23.21 | 137.58                  | 207.63      |
| Mg <sub>3</sub> Fe-CO <sub>3</sub> | 7.83          | 3.11                                | 23.48 | 177.14                  | 259.91      |

<sup>a</sup> Indexed to unit cell,  $a = b \neq c$ ;  $\alpha = \beta = \gamma = 90^\circ$



**Table S2 | Fitted resistance results from Nyquist plots in Fig. 4b.**

| Resistance     | Analysis condition                                          |                      |
|----------------|-------------------------------------------------------------|----------------------|
|                | Ni <sub>3</sub> Fe-CO <sub>3</sub> LDH/Cu foam ( $\Omega$ ) | Cu foam ( $\Omega$ ) |
| R <sub>1</sub> | 0.576                                                       | 1.123                |
| R <sub>2</sub> | 0.277                                                       | 3.658                |
| R <sub>3</sub> | 1.789                                                       | n/a                  |

**Table S3 | NO<sub>3</sub><sup>-</sup> concentration, operating voltage, faradaic efficiency and half-cell energy efficiency in Fig. 5e.**

| # of reference | Catalyst/<br>electrode                                        | NO <sub>3</sub> <sup>-</sup> conc.<br>(mM) | Operating<br>voltage<br>(V vs RHE) | Faradaic<br>efficiency<br>(%) | Energy<br>efficiency<br>(%) |
|----------------|---------------------------------------------------------------|--------------------------------------------|------------------------------------|-------------------------------|-----------------------------|
| 5              | Fe single<br>atom/glassy carbon                               | 500                                        | -0.66                              | 75.0                          | 21.4                        |
| 10             | CoP NAs/carbon<br>fiber cloth                                 | 1000                                       | -0.30                              | 97.5                          | 34.4                        |
| 13             | BCN@Cu/carbon<br>paper                                        | 100                                        | -0.60                              | 88.9                          | 26.2                        |
| 14             | Pd doped<br>TiO <sub>2</sub> /carbon cloth                    | 250                                        | -0.70                              | 92.1                          | 25.8                        |
| 15             | Fe cyano-<br>coordinated polymer<br>NSs/carbon fiber<br>paper | 100                                        | -0.50                              | 90.2                          | 30.6                        |
| 16             | NiCo <sub>2</sub> O <sub>4</sub> NW/carbon<br>cloth           | 100                                        | -0.60                              | 95.0                          | 28.0                        |
| 18             | CoO <sub>x</sub> /carbon cloth                                | 200                                        | -0.30                              | 93.4                          | 33.0                        |
| 20             | Pd onto Vulcan<br>carbon/glassy carbon                        | 20                                         | -0.20                              | 35.1                          | 13.25                       |
| 23             | Co deoped<br>Fe/Fe <sub>2</sub> O <sub>3</sub> /Ni foam       | 5                                          | -0.74                              | 85.2                          | 23.3                        |
| 24             | Pd-Cu <sub>2</sub> O<br>CEO/carbon paper                      | 0.5                                        | -0.64                              | 96.6                          | 27.8                        |
| 39             | Cu/Cu <sub>2</sub> O NWAs/Cu<br>mesh                          | 2                                          | -0.85                              | 95.8                          | 24.9                        |
| 43             | CoFe LDH/Ni foam                                              | 14                                         | -0.45                              | 97.7                          | 31.4                        |
| 44             | Cu-PTCDA/carbon<br>cloth                                      | 5                                          | -0.40                              | 85.9                          | 28.5                        |
| 45             | TiO <sub>2-x</sub> /carbon paper                              | 0.5                                        | -0.94                              | 85.0                          | 21.1                        |
| 46             | Fe doped Cu/glassy<br>carbon                                  | 2                                          | -0.74                              | 94.5                          | 25.9                        |
| 47             | Cu <sub>2</sub> O/Cu/carbon felt                              | 2.5                                        | -0.25                              | 84.4                          | 30.8                        |
| 48             | Ru <sub>x</sub> O <sub>y</sub> onto Ni-<br>MOF/Ni foam        | 0.5                                        | -0.30                              | 73.0                          | 25.8                        |
| 53             | CoAl LDH/carbon<br>cloth                                      | 100                                        | -0.7                               | 82.1                          | 22.9                        |
| This work      |                                                               | 5                                          | -0.20                              | 96.8                          | 36.6                        |
